# Supplementary material
Source: PubMed Central journal article supplement (PMC8487619)
Supplement: NIHMS1681774-supplement-Supplementary_material.pdf [file NIHMS1681774-supplement-Supplementary_material.pdf]

**Utility of a Computerized ICD-10 Algorithm to Identify Idiosyncratic Drug-Induced Liver Injury Cases in the Electronic Medical Record**

Amoah Yeboah-Korang<sup>1,2</sup> · Jeremy Louissaint<sup>1</sup> · Irene Tsung<sup>1</sup> · Sharmila Prabhu<sup>1</sup> · Robert J. Fontana<sup>1</sup>

<sup>1</sup> Division of Gastroenterology and Hepatology, University of Michigan Medical School, Ann Arbor, MI 48109, USA

<sup>2</sup> Present Address: Digestive Diseases, University of Cincinnati College of Medicine, Cincinnati, OH 45267, USA

**Corresponding Author**

Robert J. Fontana

rfontana@med.umich.edu

**Supplemental Table 1: Specific Drug Toxicity/Poisoning ICD-10 T-codes identified in the 1,211,787 encounters**

| <b>ICD-10 T-codes</b>                                                     | <b>Total Encounters</b> |
|---------------------------------------------------------------------------|-------------------------|
| T 36.0-36.9: systemic antibiotics                                         | 1691                    |
| T 37.0-37.9: systemic anti-infectives and anti-parasitics                 | 582                     |
| T 38.0-38.9: hormones, synthetic substitutes and antagonists              | 2893                    |
| T 39.0-39.9: non-opioid analgesics, antipyretics, antirheumatics          | 1829                    |
| T 40.0-40.9: narcotics and psychodysleptics, hallucinogens                | 2805                    |
| T 41.0-41.9: anesthetics and therapeutic gases                            | 4159                    |
| T 42.0-42.9: antiepileptic, sedative-hypnotic and anti-parkinsonism drugs | 1077                    |
| T 43.0-43.9: psychotropic drugs, NOS                                      | 901                     |
| T 44.0-44.9: drugs affecting autonomic nervous system                     | 362                     |
| T 45.0-45.9: hematologic drugs                                            | 11182                   |
| T 46.0-46.9: cardiovascular drugs                                         | 1289                    |
| T 47.0-47.9: gastrointestinal drugs                                       | 100                     |
| T 48.0-48.7: respiratory and musculoskeletal system drugs                 | 464                     |
| T 50.0-50.9: diuretics and other drugs, NOS                               | 5665                    |
| T 65.0-65.9: other unspecified drugs                                      | 625                     |
| <b>Overall total</b>                                                      | <b>35, 624</b>          |

**Supplemental Table 2: Toxic liver injury ICD-10 K71 codes identified in the 1,211,777 encounters**

| <b>ICD-10 K-codes</b>                                        | <b>Total Encounters</b> |
|--------------------------------------------------------------|-------------------------|
| K71.0: toxic liver disease with cholestasis                  | 60                      |
| K71.1: toxic liver disease with hepatic necrosis             | 131                     |
| K71.2: toxic liver disease with acute hepatitis              | < 10                    |
| K71.3: toxic liver disease with chronic persistent hepatitis | < 10                    |
| K71.4: toxic liver disease with chronic lobular hepatitis    | < 10                    |
| K71.50: toxic liver disease without ascites                  | < 10                    |
| K71.51: toxic liver disease with ascites                     | < 10                    |
| K71.6: toxic liver disease with hepatitis, NOS               | 164                     |
| K71.7: toxic liver disease with fibrosis and cirrhosis       | 27                      |
| K71.8: toxic liver disease with other hepatic disorders      | 23                      |
| K71.9: toxic liver disease, unspecified                      | 341                     |
| Overall total                                                | 659                     |
